1 **Alpha Phase Dynamics Predict Age-Related Visual Working Memory Decline**

2  
3 Tam T. Tran<sup>a,\*</sup>, Nicole C. Hoffner<sup>a</sup>, Sara C. LaHue<sup>d</sup>, Lisa Tseng<sup>d</sup>, and Bradley Voytek<sup>a,b,c</sup>

4  
5 <sup>a</sup>Neurosciences Graduate Program, <sup>b</sup>Institute for Neural Computation, and <sup>c</sup>Department  
6 of Cognitive Science, University of California, San Diego; and <sup>d</sup>Helen Wills  
7 Neuroscience Institute, University of California, Berkeley

8  
9 \*Corresponding author; [ttt075@ucsd.edu](mailto:ttt075@ucsd.edu)

10  
11  
12  
13  
14  
15  
16  
17  
18  
19  
20  
21  
22  
23  
24  
25  
26  
27  
28  
29  
30  
31  
32  
33  
34  
35  
36  
37  
38  
39  
40  
41  
42  
43  
44

## 45 **Abstract**

46 Alpha oscillations are modulated in response to visual temporal and spatial cues,  
47 However, the neural response to alerting cues is less explored, as is how this response  
48 is affected by healthy aging. Using scalp EEG, we examined how visual cortical alpha  
49 activity relates to working memory performance. Younger (20-30 years) and older (60-  
50 70 years) participants were presented with a visual alerting cue uninformative of the  
51 position or size of a lateralized working memory array. Older adults showed longer  
52 response times overall, and reduced accuracy when memory load was high. Older  
53 adults had less consistent cue-evoked phase resetting than younger adults, which  
54 predicted worse performance. Alpha phase prior to memory array presentation  
55 predicted response time, but the relationship between phase and response time was  
56 weaker in older adults. These results suggest that changes in alpha phase dynamics,  
57 especially prior to presentation of task-relevant stimuli, potentially contribute to age-  
58 related cognitive decline.

59

60 In order to achieve high behavioral performance, limited attentional resources  
61 must be efficiently directed towards task-relevant information. Such information could  
62 include the timing or spatial position of upcoming visual stimuli. Knowledge of when<sup>1</sup> or  
63 where<sup>2</sup> a target will appear enhances detection and shortens response times. Likewise,  
64 presentation of neutral warning cues improves response times by heightening alertness  
65 or preparedness for upcoming stimuli. The effects of informative temporal and spatial  
66 cues are strongly related to the dynamics of 7-14-Hz alpha oscillations, as observed in  
67 anticipatory changes in alpha amplitude<sup>3-6</sup> and phase<sup>7</sup>. How alpha dynamics are  
68 modulated in response to noninformative alerting cues is less understood.

69 Neurologically healthy aging is associated with declines in attention and working  
70 memory. Behaviorally, the benefits of spatial cuing are relatively resistant to healthy  
71 aging<sup>8,9</sup>, but older adults derive less benefit from the presence of temporal<sup>5</sup> and alerting  
72 cues<sup>10,11</sup>. Physiologically, older adults show reduced alpha modulation in response to  
73 temporal<sup>5</sup> and spatial cues<sup>12</sup>, though a recent study found no age-related differences in  
74 neural response to alerting cues<sup>13</sup>. However, because alpha activity was not examined  
75 in that study, it is unclear whether older adults' reduced use of alerting cues can be  
76 predicted by concomitant changes in alpha oscillatory dynamics.

77 To investigate alpha response to alerting cues, and how this response is affected  
78 by healthy aging, we recorded EEG from younger and older adults performing a  
79 unilateral visual working memory task. Each trial of the task included an alerting cue  
80 signaling the upcoming presentation of a lateralized memory array. This cue allowed us  
81 to probe participants' preparedness for upcoming stimuli independent of motor  
82 preparation. We hypothesized that age-related changes in neural activity would manifest  
83 themselves in the alpha amplitude and phase response to presentations of the alerting  
84 cue. We also hypothesized that the extent to which neural response to the alerting cue  
85 was altered would also predict declines in working memory performance.

86

## 87 **Results**

### 88 **Behavior**

89 **Response Time.** We compared younger and older adults' response times (RTs) on a  
90 lateralized visual working memory task (Fig. 1a, see Methods). RTs showed main  
91 effects of age (Fig. 1b,  $F_{1,29} = 13.32$ ,  $p = 0.0010$ , generalized  $\eta^2 = 0.31$ ) and memory  
92 load ( $F_{2,58} = 67.20$ , Greenhouse-Geisser (GG)  $\epsilon = 0.88$ ,  $p_{GG} < 10^{-13}$ ,  $\eta^2 = 0.089$ ) and an  
93 interaction between age and memory load ( $F_{2,58} = 3.75$ ,  $\epsilon = 0.88$ ,  $p_{GG} = 0.029$ ,  $\eta^2 =$   
94  $0.0054$ ). Between groups, younger adults had faster RTs than older adults in each load  
95 condition. This included load-one (541 ms vs. 643 ms, mean difference 95% confidence  
96 interval [-166 ms, -39 ms],  $t_{28,91} = -3.29$ ,  $p = 0.0027$ , Cohen's  $d = -1.17$ ), load-two (565  
97 ms vs. 670 ms, [-166 ms, -44 ms],  $t_{29} = -3.51$ ,  $p = 0.0015$ , Cohen's  $d = -1.24$ ), and load-  
98 three conditions (591 ms vs. 721 ms, [-195 ms, -65 ms],  $t_{29} = -4.09$ ,  $p < 10^{-3}$ , Cohen's  $d$   
99  $= -1.45$ ).

100  
101 **Accuracy.** As assessed using the sensitivity measure  $d'$ , accuracy showed an effect of  
102 memory load (Fig. 1c,  $F_{2,58} = 51.04$ ,  $\epsilon = 0.92$ ,  $p_{GG} < 10^{-11}$ ,  $\eta^2 = 0.16$ ) and an interaction  
103 between age and memory load ( $F_{2,58} = 5.78$ ,  $\epsilon = 0.83$ ,  $p_{GG} = 0.0065$ ,  $\eta^2 = 0.021$ ).  
104 Accuracy was comparable between younger and older adults in load-one ( $p =$   
105  $0.73$ , Cohen's  $d = 0.13$ ) and load-two conditions ( $p = 0.22$ , Cohen's  $d = 0.45$ ). However,  
106 younger adults outperformed older adults in load-three conditions (3.32 vs. 2.58, [0.042,  
107 1.45],  $t_{29,00} = 2.17$ ,  $p = 0.039$ , Cohen's  $d = 0.77$ ). In summary, older adults showed  
108 slower RTs overall and reduced working memory accuracy specifically during high-load  
109 trials.

## 110 111 EEG

112 **Alerting Cue Activity.** To investigate neurophysiological measures potentially  
113 underlying decreased behavioral performance in older adults, we first examined  
114 younger and older adults' neural response to presentations of the alerting cue. During  
115 task performance, younger and older adults exhibited 7-14 Hz oscillatory alpha activity  
116 in visual parietal-occipital regions (Fig. 2a). Based on participants' peak alpha  
117 frequency, previously shown to be lower in older adults<sup>14</sup>, we determined individualized  
118 alpha bands and compared participants' normalized alpha analytic amplitude and  
119 instantaneous phase activity during the task. To examine the consistency in alpha  
120 phase activity across trials, we also computed alpha intertrial coherence (ITC) per  
121 participant.

122 Parietal-occipital visual regions showed alpha amplitude and ITC response to  
123 presentations of the alerting cue (Fig. 2b, 2c). Alpha amplitude modulation in response  
124 to the alerting cue (-350 to 0 ms) showed no effects of age ( $F_{1,29} = 2.82$ ,  $p = 0.10$ ,  $\eta^2 =$   
125  $0.074$ ), hemisphere ( $F_{1,29} < 1.0$ ), or memory load ( $F_{2,58} < 1.0$ ). This lack of hemisphere  
126 and memory load effect is consistent with the alerting cue being uninformative of the  
127 lateral position and number of upcoming stimuli.

128 Compared to baseline (-500 to -350 ms), alpha ITC increased in response to the  
129 alerting cue in both younger and older adults. Using a resampling procedure to compare  
130 cue-evoked to baseline ITC on a per-subject basis, we determined that all 17 younger  
131 adults, as well as 11 out of 14 older adults, showed cue-evoked increases in ITC ( $p <$   
132  $10^{-4}$  for all). These increases in ITC suggest the presence of stimulus-evoked alpha

133 phase resets in both younger and older adults. As with alpha amplitude, cue-evoked ITC  
134 did not show an effect of hemisphere ( $F_{1,29} < 1.0$ ) or memory load ( $F_{2,58} < 1.0$ ), again  
135 consistent with the noninformative nature of the alerting cue. However, younger adults  
136 had higher cue-evoked ITC than did older adults (Fig. 3a, 3b, 0.63 vs. 0.23, [0.24, 0.56],  
137  $F_{1,29} = 23.64$ ,  $p < 10^{-4}$ ,  $\eta^2 = 0.32$ ).

138  
139 **Memory Array Activity.** Younger adults also showed alpha response to presentation of  
140 the memory array. After memory array onset, alpha amplitude diverged between  
141 hemispheres in younger and older adults (Fig. 2b). Mean alpha amplitude (0 to 400 ms)  
142 showed main effects of memory load (Fig. 4a, 4b,  $F_{2,58} = 4.29$ ,  $\varepsilon = 0.87$ ,  $p_{GG} = 0.024$ ,  $\eta^2$   
143  $= 0.011$ ) and hemisphere ( $F_{1,29} = 18.15$ ,  $p < 10^{-3}$ ,  $\eta^2 = 0.034$ ) and an interaction  
144 between age and hemisphere ( $F_{1,29} = 9.10$ ,  $p = 0.0053$ ,  $\eta^2 = 0.017$ ). Post hoc analysis  
145 revealed that alpha amplitude decreased from load-one to load-two ([0.0053, 0.056],  $t_{30}$   
146  $= 2.47$ ,  $p = 0.019$ , Cohen's  $d = 0.44$ ), but not from load-two to load-three conditions ( $p =$   
147  $0.37$ , Cohen's  $d = 0.17$ ). In addition, alpha lateralization, or the difference in alpha  
148 amplitude between hemispheres, was greater in younger than older adults (0.11 vs.  
149 0.019, [0.034, 0.15],  $t_{23,21} = 3.22$ ,  $p = 0.0038$ , Cohen's  $d = 1.09$ ).

150 As with alerting cue presentation, memory array presentation also caused alpha  
151 phase resets (Fig. 2c). Overall, 15 of 17 younger adults as well as 12 of 14 older adults  
152 showed array-evoked ITC ( $p < 10^{-4}$  for all). Unlike with cue-evoked ITC, array-evoked  
153 ITC showed no effects of memory load ( $F_{2,58} < 1.0$ ), age ( $F_{1,29} = 1.60$ ,  $p = 0.22$ ,  $\eta^2 =$   
154  $0.028$ ), or hemisphere ( $F_{1,29} < 1.0$ ).

155  
156 **Contralateral Delay Activity.** We also investigated participants' contralateral delay  
157 activity (CDA), an event-related potential measure indicative of working memory  
158 capacity<sup>15,16</sup> and top-down attentional processes<sup>17-20</sup>. We observed sustained delay-  
159 period (300 to 900 ms) negativity in the hemisphere contralateral to the memory array  
160 (Fig. 5a). This negativity or CDA showed a main effect of memory load (Fig. 5b,  $F_{2,58} =$   
161  $14.88$ ,  $\varepsilon = 0.96$ ,  $p_{GG} < 10^{-5}$ ,  $\eta^2 = 0.080$ ), wherein CDA increased in magnitude from load-  
162 one to load-two conditions ([0.34  $\mu$ V, 0.86  $\mu$ V],  $t_{30} = 4.66$ ,  $p < 10^{-4}$ , Cohen's  $d = 0.84$ ).  
163 CDA was comparable between load-two and load-three conditions ( $p = 0.47$ , Cohen's  $d$   
164  $= 0.13$ ). However, CDA did not differ between younger and older adults ( $F_{1,29} = 1.05$ ,  $p =$   
165  $0.31$ ,  $\eta^2 = 0.029$ ), nor did we observe an interaction between age and memory load  
166 ( $F_{2,58} < 1.0$ ).

167  
168 **Alpha Phase Activity Predicts Behavior.** Given the age-related changes in neural  
169 activity that we observed, we examined how these changes related to behavioral  
170 performance. As noted, older adults performed as well as younger adults on the easiest  
171 (load-one and load-two) trials, but performed worse for more difficult load-three trials.  
172 We examined the neurophysiological basis for this behavioral aging effect using a  
173 multiple linear regression analysis. This analysis allowed us to examine the relative  
174 contribution of each neurophysiological measure to behavioral accuracy. Specifically,  
175 we modeled  $d'$  as a linear combination of cue-evoked alpha ITC, array-evoked alpha  
176 amplitude modulation, and delay-period CDA. Cue-evoked ITC was averaged across

177 visual hemispheres, and the lateralized difference was used for array-evoked amplitude  
178 activity. Importantly, these physiological measures were indexed during times *prior to*  
179 the actual memory challenge and thus are related to trial-by-trial changes in alertness,  
180 encoding, or memory maintenance, rather than memory retrieval or response.

181 This model explained 17.1% of the variance in accuracy ( $p = 0.045$ ). Examining  
182 the relative contribution of each predictor, we found that after accounting for alpha  
183 lateralization and CDA, cue-evoked ITC remained predictive of load-three accuracy ( $p =$   
184  $0.013$ ). Cue-evoked ITC was correlated with load-three accuracy across all participants  
185 (Fig. 6a;  $N = 31$ , Spearman's  $r = 0.47$ ,  $p = 0.0071$ ) and correlated with load-three  
186 accuracy across younger adults alone ( $N = 17$ , Spearman's  $r = 0.49$ ,  $p = 0.044$ ). Alpha  
187 lateralization and CDA, on the other hand, did not remain predictive of load-three  
188 accuracy after accounting for other physiological measures ( $p = 0.28$ ,  $p = 0.94$ ). Thus,  
189 cue-evoked ITC prior to the presentation of to-be-remembered stimuli was a strong  
190 predictor of behavioral accuracy, even after adjusting for array-related alpha amplitude  
191 and delay-period CDA effects.

192 To further investigate how cue-evoked alpha ITC is associated with behavioral  
193 performance, we examined how alpha phase at peak ITC related to subsequent working  
194 memory performance. To do so, we determined the timepoint of each participant's peak  
195 cue-related ITC, and we pooled all participants' corresponding alpha phases and RTs  
196 across trials. During load-three trials in younger adults, alpha phase at peak cue-evoked  
197 ITC predicted RTs on a trial-by-trial basis (Fig. 6b, blue;  $N = 2499$ ,  $r = 0.14$ ,  $p < 10^{-3}$ ).  
198 Alpha phase at peak cue-evoked ITC also predicted RTs in older adults (Fig. 5B, green;  
199  $N = 2090$ ,  $r = 0.079$ ,  $p = 0.0015$ ). Thus, despite older adults' relatively inconsistent cue-  
200 evoked phase response, prestimulus alpha phase was still predictive of load-three RTs.  
201 However, the relationship between alpha phase at peak cue-evoked ITC and RT was  
202 weaker in older than younger adults ( $z = 1.95$ ,  $p = 0.026$ ).

203

## 204 Discussion

205 In this study, we used a combined visual attention and working memory task to  
206 investigate how age-related changes in alertness and spatial attention affect later  
207 working memory performance. Using scalp EEG, we found that alpha activity showed  
208 age-related alterations during the task, including in older adults' reduced alpha  
209 amplitude lateralization during working memory maintenance. In addition, prior to  
210 working memory encoding, older participants showed less consistent phase response to  
211 a noninformative alerting cue. The consistency of cue-evoked alpha phase reset  
212 predicted working memory performance, as did prestimulus alpha phase prior to  
213 memory array presentation. Our results provide evidence that alerting cue presentation  
214 is accompanied by alpha activity modulation, that neural response to alerting cues is  
215 altered during healthy aging, and that the degree of alteration could influence behavioral  
216 outcomes.

217 In this task, compared to younger adults, older adults had slower response times  
218 in each memory load condition, but lower accuracy only during load-three trials. These  
219 slower response times could indicate a speed-accuracy trade-off strategy in older  
220 adults, perhaps accounting for older adults performing with accuracy comparable to that

221 of younger adults in low-load conditions. In addition to their longer response times, older  
222 adults were less accurate in high-load trials. Thus, any benefit of slowing was unable to  
223 preserve performance in high-load trials, underscoring that age-related reductions in  
224 attention and working memory performance are more readily apparent during  
225 increasingly difficult tasks.

226 Previous research has found that contralateral delay activity (CDA) is related to  
227 reduced working memory performance in older frontal and basal ganglia lesion patient  
228 populations<sup>21,22</sup>. In this study, we observed no difference in the amplitude or load-  
229 dependent modulation of CDA between younger and older adults. A previous study has  
230 reported alterations in CDA modulation in older adults<sup>23</sup>, but differences between this  
231 study and our present study are likely due to our study only presenting stimuli in one  
232 visual hemifield at a time. Thus, any age-related differences in the suppression of  
233 distractor processing were not tested, likely altering patterns of CDA modulation in older  
234 adults.

235 After memory array presentation, alpha amplitude in younger adults diverged  
236 between hemispheres, with ipsilateral amplitude higher than contralateral amplitude.  
237 Consistent with previous studies<sup>3,4</sup>, this alpha lateralization is suggestive of differential  
238 processing of the two visual hemifields and the deployment of selective spatial attention  
239 in anticipation of the test array, which participants knew would appear in the same  
240 visual hemifield as the memory array. This interpretation is also consistent with the lack  
241 of alpha lateralization in response to the spatially uninformative alerting cue. Compared  
242 to younger adults, older adults showed reduced alpha lateralization, as previously  
243 reported in studies with spatial cuing<sup>12,24</sup>. However, neither the degree of alpha  
244 lateralization nor the magnitude of CDA predicted older adults' lower accuracy during  
245 load-three trials.

246 Instead, cue-evoked alpha phase resetting was less consistent in older adults  
247 and was predictive of behavioral performance even after adjusting for array-evoked  
248 alpha lateralization and delay-period CDA. Because the alerting cue appeared prior to  
249 any stimulus to be encoded in working memory, this result supports findings of reduced  
250 alertness in older adults<sup>10,11</sup>, with participants' general attentional state being the single  
251 best predictor of accuracy more than a second later in the trial. While the age-related  
252 inconsistency in cue-evoked alpha phase resetting is opposite that in a previous study<sup>24</sup>,  
253 this discrepancy could be due to the lack of distractor stimuli and the briefness with  
254 which we presented the alerting cue (50 ms). This briefness potentially exacerbated any  
255 age-related alterations in cue response, which has not been observed in other  
256 studies<sup>5,13</sup>.

257 Interestingly, we also found that array-evoked ITC was similar between younger  
258 and older adults, despite previous reports showing increased ITC among older adults<sup>24</sup>.  
259 However, the large, asymmetric cue-evoked ITC differences between younger and older  
260 adults may have shifted the ITC baseline, artificially driving up younger-adult ITC. That  
261 is, the peak-to-peak difference between cue- and array-evoked ITC is much larger  
262 among older, compared to younger, adults. Nevertheless, that cue-evoked alpha phase  
263 consistency was predictive of behavioral performance is consistent with previous  
264 studies examining alpha phase resetting in response to task-relevant stimuli<sup>25-27</sup>. Our

265 results extend these findings by demonstrating that alpha phase resetting in response to  
266 noninformative cues, even prior to presentation of to-be-remembered stimuli, can  
267 predict subsequent working memory performance.

268 Alpha phase prior to memory array presentation also predicted response time in  
269 high-load trials. This result provides further evidence for the effects of alpha phase on  
270 visual working memory<sup>28</sup>. These effects have also been demonstrated in visual  
271 detection paradigms<sup>29,30</sup>. Due to the consistent time interval between cue and memory  
272 array presentation in our study, it is possible that cue-evoked alpha phase resets led to  
273 subsequent memory array presentation at phases facilitative of or detrimental to  
274 perception or encoding of the memory array. Older adults' inconsistency in phase  
275 response could have led to a greater number of instances in which memory array  
276 presentation occurred at suboptimal alpha phases, potentially explaining part of the age-  
277 related reductions in performance we observed during high-load trials. However, older  
278 adults' weaker relationship between alpha phase and response time suggests age-  
279 related reductions in the influence of alpha phase on visual cognition. Physiologically,  
280 this reduced influence, as well as older adults' inconsistent cue-evoked phase  
281 responses, may relate to age-related increases in neural noise<sup>31,32</sup>.

282 Overall, we find that oscillatory alpha dynamics may underlie age-related  
283 alterations in attention. Our analysis of alpha phase highlights reductions in older adults'  
284 response and attentiveness to alerting cues, with such responsiveness being the  
285 strongest predictor of working memory performance. In addition, prestimulus alpha  
286 phase predicted performance on a trial-by-trial basis, but less reliably so in older adults.  
287 Given that lower performance in older adults can be explained by altered response to  
288 alerting cues prior to the task, age-related working memory decline is likely multifaceted  
289 and includes alterations in anticipatory attentional allocation as well as in stimulus  
290 encoding and maintenance. These findings suggest that changes in neural response,  
291 especially in older adults, can occur at multiple timepoints both before and after  
292 presentation of task-relevant stimuli, and such alterations likely all have an impact on  
293 later cognitive performance.

294

## 295 **Methods**

296 **Behavioral Task.** Healthy right-handed younger (20-30 year olds,  $n = 17$ , eight female)  
297 and older (60-70 year olds,  $n = 14$ , seven female) adults with normal or corrected-to-  
298 normal vision participated in a visual working memory paradigm. All participants gave  
299 informed consent approved by the UC Berkeley Committee on Human Research. In  
300 each trial, participants were instructed to maintain central fixation, and at the beginning  
301 of each trial, the central fixation cross flashed from gray to pink for 50 ms, alerting  
302 participants to the start of the upcoming trial (Fig. 1A). This alerting cue offered no  
303 information on either the size or location of upcoming visual stimuli. Three hundred ms  
304 after the end of the alerting cue, participants were presented with one, two, or three  
305 colored squares for 180 ms in only one visual hemifield. After a 900 ms delay period,  
306 during which time no stimuli other than the fixation cross were present, a test array of  
307 the same number of squares in the same spatial locations appeared. Participants would

308 manually respond with their right thumb to indicate whether or not the test array had the  
309 same color squares as the initial memory array.

310 Behavioral accuracy was assessed using  $d'$ , a sensitivity measure that takes  
311 false alarm and miss rates into account to correct for response bias. To avoid  
312 mathematical constraints in the calculation of  $d'$ , we applied a standard correction  
313 procedure in the case of 100% hit rate or 0% false alarm rate. Specifically, hit rate was  
314 decreased to  $1 - 1/(2N)$  when necessary, with  $N$  being the total number of trials.  
315 Similarly, false alarm rate was increased to  $1/(2N)$  when necessary<sup>33</sup>.

316  
317 **Data Acquisition.** We recorded 64-channel scalp electroencephalography (EEG) from  
318 each participant. Participants were tested in a sound-attenuated EEG recording room  
319 using a 64+8 channel BioSemi ActiveTwo amplifier (Amsterdam, Netherlands). EEG  
320 was amplified (-3 dB at ~819 Hz low-pass, DC coupled), digitized (512 Hz), and stored  
321 for offline analysis. Horizontal eye movements (HEOG) were recorded with electrodes at  
322 both external canthi. Vertical eye movements (VEOG) were monitored with a left inferior  
323 eye electrode and either a superior eye or a fronto-polar electrode. All data was  
324 referenced offline to the average potential of two mastoid electrodes and analyzed in  
325 MATLAB® (R2015A, Natick, MA) using custom scripts and the EEGLAB toolbox<sup>34</sup>.

326  
327 **Data Preprocessing.** EEG data was downsampled to 256 Hz and had DC offset  
328 removed. EEG data was then highpass filtered above 0.1 Hz using a two-way, fourth-  
329 order Butterworth infinite impulse response filter. Any channel whose standard deviation  
330 was  $\pm 2.5$  standard deviations away from the mean standard deviation of all channels  
331 was spherically interpolated (on average, 2 channels per participant). Independent  
332 component analysis (ICA) was performed using the EEGLAB toolbox, and to remove  
333 blink artifacts, ICA components most correlated with the difference between the  
334 frontopolar and left inferior eye electrodes were removed.

335 For event-related potential (ERP) analyses and to detect trials with artifacts,  
336 continuous EEG data was lowpass filtered below 30 Hz using a two-way, fourth-order  
337 Butterworth infinite impulse response filter. Data was epoched around the onset of the  
338 memory array using a pre-stimulus baseline of -500 ms to -400 ms. For scalp  
339 topographic visualization, and to normalize electrode locations, electrode potentials  
340 were swapped right to left across the midline as though stimuli were always presented  
341 in the right visual hemifield, making left and right hemisphere channels contralateral and  
342 ipsilateral to the stimulus, respectively. Lateralized potentials were analyzed in this  
343 ipsilateral-contralateral fashion. Trials where the standard deviation of a scalp electrode  
344 exceeded three times the standard deviation of that electrode across all trials were  
345 excluded. For saccade trials, trials where the standard deviation of the difference  
346 between the HEOG channels exceeded three times the mean of the HEOG channels  
347 across all trials were excluded. On average, 69.6% of total trials or 165 trials were kept  
348 per participant. No participants were excluded.

349  
350 **Data Analysis.** Peak alpha frequency (PAF), the frequency of maximum power  
351 between 7 and 14 Hz, varies in a trait-like manner<sup>35</sup> and predicts visual performance<sup>36</sup>.



352 To estimate PAF for each participant, we constructed power spectral densities (PSDs)  
353 using Welch's method. In order to account for individual differences in  $1/f$   
354 electrophysiological background, which changes with age<sup>31</sup>, we used robust linear  
355 regression to estimate and remove the slope and offset of log-log space PSDs prior to  
356 identification of PAF.

357 Continuous, non-lowpass-filtered EEG data was bandpass filtered with a 4-Hz  
358 passband centered on each participant's PAF. Filters were designed as two-way finite  
359 impulse response filters with filter length equal to three cycles of the low cutoff  
360 frequency. For each channel, bandpass-filtered time series were converted to z-scores  
361 using the mean and standard deviation of artifact-free alpha-band data across all trials  
362 and conditions. After normalization, the absolute value and angle of the Hilbert  
363 transform of the continuous EEG data was used to extract alpha analytic amplitudes  
364 and instantaneous phases, respectively. The phase time series yields cosine phase  
365 values of  $(-\pi, \pi]$  radians, with  $\pi$  radians corresponding to the trough and zero radians to  
366 the peak of the oscillation. This method yields results equivalent to sliding-window fast  
367 Fourier transform and wavelet approaches<sup>37</sup>.

368 After epoching and removal of marked artifact trials, alpha analytic amplitude  
369 time series were subjected to event-related analyses, including the subtraction of  
370 baseline activity from -500 ms to -400 ms. To assess trial-to-trial phase consistency  
371 (also called intertrial coherence, ITC), event-related phase time series were extracted,  
372 and for each time point, the mean vector length of the timepoint's phase distribution was  
373 calculated across trials (*circ\_r.m* function in the CircStats toolbox<sup>38</sup>). This mean vector  
374 length represents the degree of ITC, with ITC of unity reflecting a single adopted phase  
375 across trials and a value of zero reflecting uniformly distributed phases across trials. To  
376 assess single-subject ITC significance, a resampling approach was used. For each  
377 participant, we randomly sampled  $n/2$  trials and calculated time-resolved ITC. For each  
378 of these sub-samples, we then calculated mean cue/array-related minus mean baseline  
379 ITC value. This was done 1000 times to build a single-subject distribution of cue/array-  
380 related ITC strength, and  $H_0$  is that the mean of the distribution of differences is zero. A  
381 one-sample, one-tailed  $t$ -test was used to compare the distribution of these differences  
382 against  $H_0$  for each participant.

383  
384 **Statistical Analyses.** All analyses were performed on data from EEG channels O1/2,  
385 PO3/4, and PO7/8, with channels O1, PO3, and PO7 considered contralateral to the  
386 memory array. Multiple-factor statistical analyses were assessed via ANOVAs, with age  
387 as a between-group factor and memory load and hemisphere as within-group factors.  
388 Where sphericity assumptions were violated, degrees of freedom (and hence  $p$ -values)  
389 were adjusted using Greenhouse-Geisser corrections. All single-factor comparisons  
390 were analyzed via paired-samples or between-samples  $t$ -tests. For all alpha ITC  
391 analyses except those pertaining to single-subject ITC significance, ITC values were  
392  $\log_{10}$ -transformed and baseline subtracted. Peak cue- and array-related ITC were  
393 assessed using the maximum ITC peak after cue and memory array presentation,  
394 respectively. To correlate circular variables like alpha phase with linear variables like

395 response time, a circular-linear correlation was used (*circ\_corrcl.m* function in the  
396 CircStats toolbox).

397

## 398 **References**

- 399 1. Nobre, A. C., Correa, A. & Coull, J. T. The hazards of time. *Current Opinion in*  
400 *Neurobiology* **17**, 465–470 (2007).
- 401 2. Posner, M. I. Orienting of attention. *Quarterly Journal of Experimental Psychology*  
402 **32**, 3–25 (1980).
- 403 3. Worden, M. S., Foxe, J. J., Wang, N. & Simpson, G. V. Anticipatory Biasing of  
404 Visuospatial Attention Indexed by Retinotopically Specific. *Journal of*  
405 *Neuroscience* **20**, 1–6 (2000).
- 406 4. Thut, G., Nietzel, A., Brandt, S. A. & Pascual-Leone, A. Alpha-Band  
407 Electroencephalographic Activity over Occipital Cortex Indexes Visuospatial  
408 Attention Bias and Predicts Visual Target Detection. *Journal of Neuroscience* **26**,  
409 9494–9502 (2006).
- 410 5. Zanto, T. P. *et al.* Age-Related Changes in Orienting Attention in Time. *Journal of*  
411 *Neuroscience* **31**, 12461–12470 (2011).
- 412 6. van Diepen, R. M., Cohen, M. X., Denys, D. & Mazaheri, A. Attention and  
413 Temporal Expectations Modulate Power, Not Phase, of Ongoing Alpha  
414 Oscillations. *Journal of Cognitive Neuroscience* **27**, 1573–1586 (2015).
- 415 7. Samaha, J., Bauer, P., Cimaroli, S. & Postle, B. R. Top-down control of the phase  
416 of alpha-band oscillations as a mechanism for temporal prediction. *Proc. Natl.*  
417 *Acad. Sci. U.S.A.* **112**, 8439–8444 (2015).
- 418 8. Madden, D. J. Adult age differences in attentional selectivity and capacity.  
419 *European Journal of Cognitive Psychology* **2**, 229–252 (1990).
- 420 9. Hartley, A. A. Evidence for the selective preservation of spatial selective attention  
421 in old age. *Psychology and Aging* **8**, 371–379 (1993).
- 422 10. Gamboz, N., Zamarian, S. & Cavallero, C. Age-Related Differences in the  
423 Attention Network Test (ANT). *Experimental Aging Research* **36**, 287–305 (2010).
- 424 11. Jennings, J. M., Dagenbach, D., Engle, C. M. & Funke, L. J. Age-Related  
425 Changes and the Attention Network Task: An Examination of Alerting, Orienting,  
426 and Executive Function. *Aging, Neuropsychology, and Cognition* **14**, 353–369  
427 (2007).
- 428 12. Hong, X., Sun, J., Bengson, J. J., Mangun, G. R. & Tong, S. Normal aging  
429 selectively diminishes alpha lateralization in visual spatial attention. *NeuroImage*  
430 **106**, 353–363 (2015).
- 431 13. Williams, R. S. *et al.* Age differences in the Attention Network Test: Evidence from  
432 behavior and event-related potentials. *Brain and Cognition* **102**, 65–79 (2016).
- 433 14. Obrist, W. D. The electroencephalogram of normal aged adults.  
434 *Electroencephalogr Clin Neurophysiol* **6**, 235–244 (1954).
- 435 15. Vogel, E. K. & Machizawa, M. G. Neural activity predicts individual differences in  
436 visual working memory capacity. *Nature* **428**, 748–751 (2004).
- 437 16. McCollough, A. W., Machizawa, M. G. & Vogel, E. K. Electrophysiological  
438 Measures of Maintaining Representations in Visual Working Memory. *Cortex* **43**,

- 439 77–94 (2007).
- 440 17. Drew, T. & Vogel, E. K. Neural Measures of Individual Differences in Selecting  
441 and Tracking Multiple Moving Objects. *Journal of Neuroscience* **28**, 4183–4191  
442 (2008).
- 443 18. Woodman, G. F. & Vogel, E. K. Selective storage and maintenance of an object's  
444 features in visual working memory. *Psychon Bull Rev* **15**, 223–229 (2008).
- 445 19. Fukuda, K. & Vogel, E. K. Human Variation in Overriding Attentional Capture.  
446 *Journal of Neuroscience* **29**, 8726–8733 (2009).
- 447 20. Eimer, M. & Kiss, M. An electrophysiological measure of access to  
448 representations in visual working memory. *Psychophysiol* **47**, 197–200 (2010).
- 449 21. Voytek, B. & Knight, R. T. Prefrontal cortex and basal ganglia contributions to  
450 visual working memory. *Proceedings of the National Academy of Sciences* **107**,  
451 18167–18172 (2010).
- 452 22. Voytek, B. *et al.* Dynamic Neuroplasticity after Human Prefrontal Cortex Damage.  
453 *Neuron* **68**, 401–408 (2010).
- 454 23. Sander, M. C., Werkle-Bergner, M. & Lindenberger, U. Contralateral Delay Activity  
455 Reveals Life-Span Age Differences in Top-Down Modulation of Working Memory  
456 Contents. *Cerebral Cortex* **21**, 2809–2819 (2011).
- 457 24. Sander, M. C., Werkle-Bergner, M. & Lindenberger, U. Amplitude modulations  
458 and inter-trial phase stability of alpha-oscillations differentially reflect working  
459 memory constraints across the lifespan. *NeuroImage* **59**, 646–654 (2012).
- 460 25. Klimesch, W. *et al.* Phase-locked alpha and theta oscillations generate the P1–N1  
461 complex and are related to memory performance. *Cognitive Brain Research* **19**,  
462 302–316 (2004).
- 463 26. Yamagishi, N., Callan, D. E., Anderson, S. J. & Kawato, M. Attentional changes in  
464 pre-stimulus oscillatory activity within early visual cortex are predictive of human  
465 visual performance. *Brain Research* **1197**, 115–122 (2008).
- 466 27. Werkle-Bergner, M., Freunberger, R., Sander, M. C., Lindenberger, U. &  
467 Klimesch, W. Inter-individual performance differences in younger and older adults  
468 differentially relate to amplitude modulations and phase stability of oscillations  
469 controlling working memory contents. *NeuroImage* **60**, 71–82 (2012).
- 470 28. Myers, N. E., Stokes, M. G., Walther, L. & Nobre, A. C. Oscillatory Brain State  
471 Predicts Variability in Working Memory. *Journal of Neuroscience* **34**, 7735–7743  
472 (2014).
- 473 29. Mathewson, K. E., Gratton, G., Fabiani, M., Beck, D. M. & Ro, T. To See or Not to  
474 See: Prestimulus Alpha Phase Predicts Visual Awareness. *Journal of*  
475 *Neuroscience* **29**, 2725–2732 (2009).
- 476 30. Busch, N. A., Dubois, J. & VanRullen, R. The Phase of Ongoing EEG Oscillations  
477 Predicts Visual Perception. *Journal of Neuroscience* **29**, 7869–7876 (2009).
- 478 31. Voytek, B. *et al.* Age-Related Changes in 1/f Neural Electrophysiological Noise.  
479 *Journal of Neuroscience* **35**, 13257–13265 (2015).
- 480 32. Voytek, B. & Knight, R. T. Dynamic Network Communication as a Unifying Neural  
481 Basis for Cognition, Development, Aging, and Disease. *Biological Psychiatry* **77**,  
482 1089–1097 (2015).

- 483 33. Macmillan, N. A. & Creelman, C. D. *Detection Theory: A User's Guide*.  
484 (Psychology Press, 2004).
- 485 34. Delorme, A. & Makeig, S. EEGLAB: an open source toolbox for analysis of single-  
486 trial EEG dynamics including independent component analysis. *Journal of*  
487 *Neuroscience Methods* **134**, 9–21 (2004).
- 488 35. Grandy, T. H. *et al.* Individual alpha peak frequency is related to latent factors of  
489 general cognitive abilities. *NeuroImage* **79**, 10–18 (2013).
- 490 36. Samaha, J. & Postle, B. R. The Speed of Alpha-Band Oscillations Predicts the  
491 Temporal Resolution of Visual Perception. *Current Biology* 1–7 (2015).  
492 doi:10.1016/j.cub.2015.10.007
- 493 37. Bruns, A. Fourier-, Hilbert- and wavelet-based signal analysis: are they really  
494 different approaches? *Journal of Neuroscience Methods* **137**, 321–332 (2004).
- 495 38. Berens, P. CircStat: a MATLAB toolbox for circular statistics. *Journal of Statistical*  
496 *Software* **31**, (2009).

497

### 498 **Acknowledgements**

499 We thank S.R. Cole, T. Donoghue, R. van der Meij, T. Noto, E.J. Peterson, and B.  
500 Postle for invaluable discussion and comments. This work was supported by the  
501 University of California, San Diego, Qualcomm Institute, California Institute for  
502 Telecommunications and Information Technology, Strategic Research Opportunities  
503 Program, and a Sloan Research Fellowship.

504

### 505 **Author Contributions**

506 B.V. designed research. S.C.L., L.T., and B.V. performed research. T.T.T. and N.C.H.  
507 analyzed the data. T.T.T. and B.V. drafted the manuscript. All authors edited and  
508 approved the manuscript.

509

### 510 **Competing Financial Interests**

511 The authors declare no competing financial interests.

512

### 513 **Materials and Correspondence**

514 Correspondence and requests for materials can be addressed to Tam T. Tran.

515

516

517

518

519

520

521

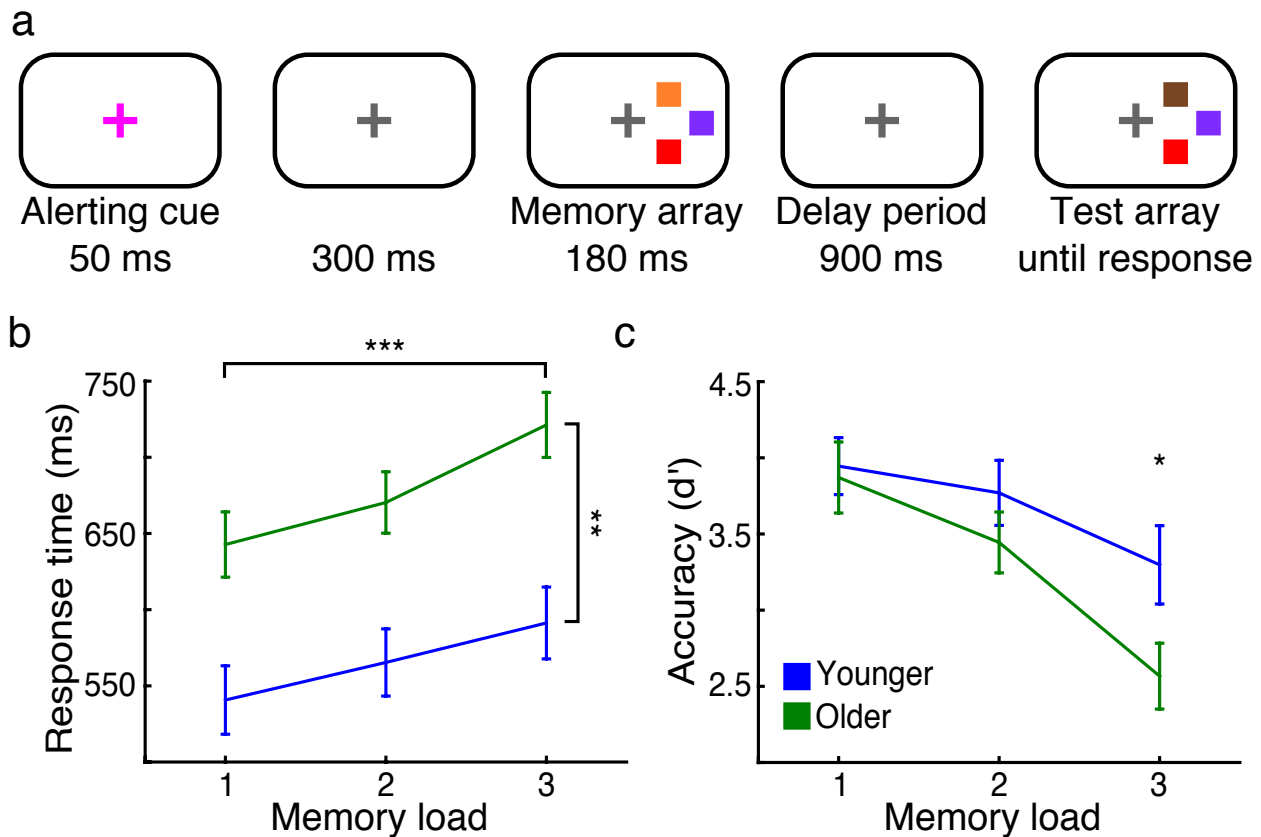

522  
523  
524  
525  
526  
527  
528  
529  
530

**Figure 1.** Paradigm, behavioral performance, and event-related activity. (a) Diagram of the task design, in this example showing a non-matching test array. (b) Response times increased with increasing memory load, with younger adults (blue) faster than older adults (green,  $**p < 0.01$ ,  $***p < 0.001$ ; error bars, SEM). (c) Accuracy decreased with increasing memory load, with younger adults more accurate than older adults during load-three trials ( $*p < 0.05$ ; age by memory load interaction:  $p < 0.01$ ; error bars, SEM).

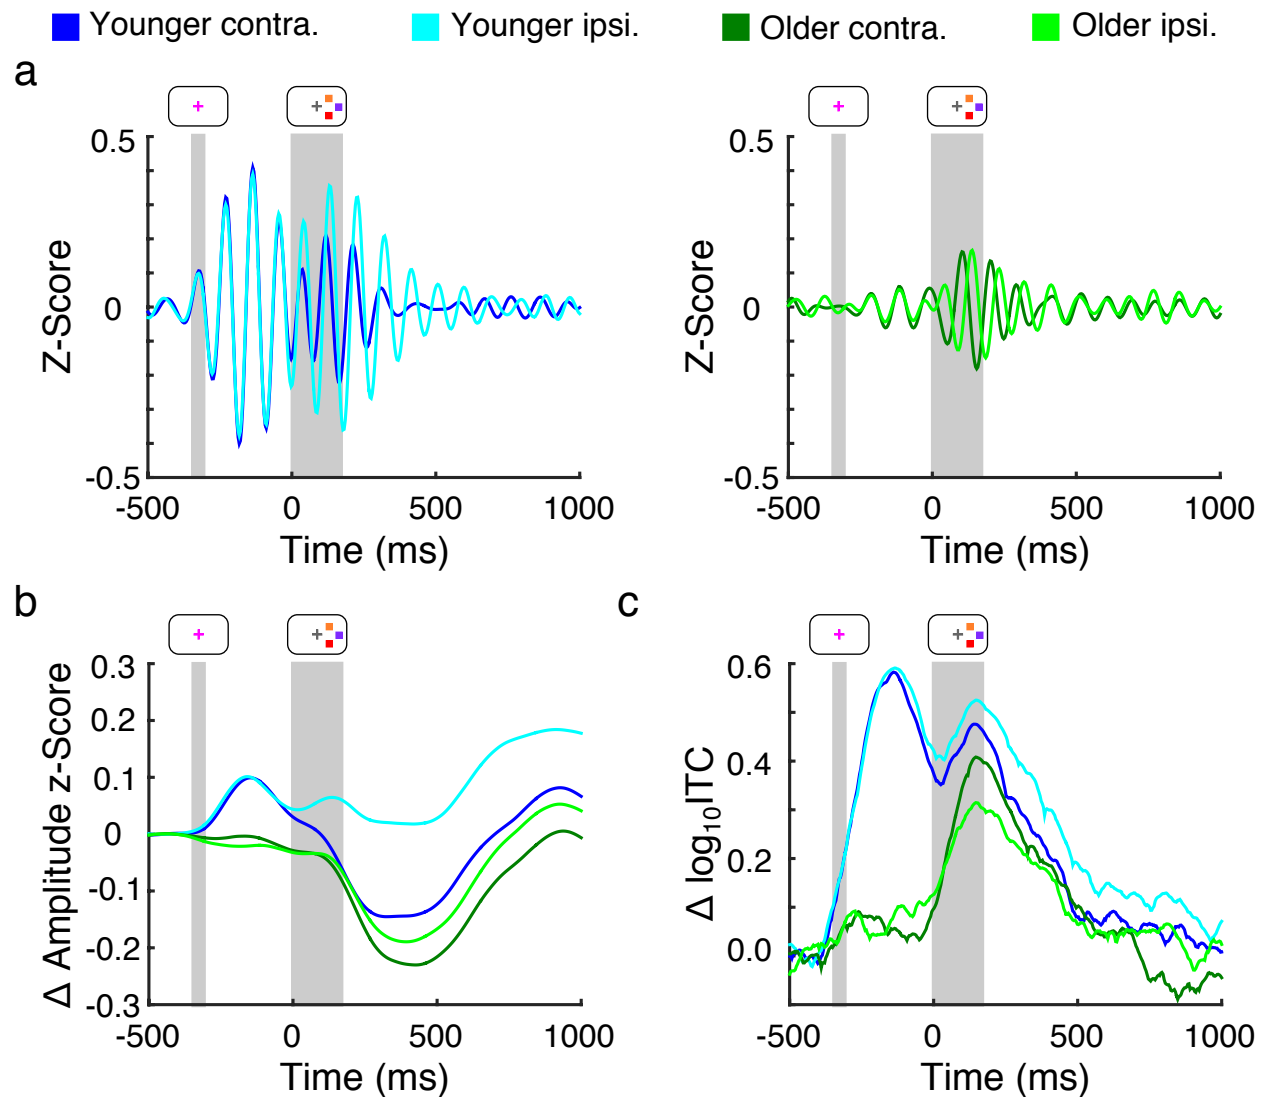

531  
532  
533  
534  
535  
536  
537  
538  
539  
540

**Figure 2.** Alpha amplitude and phase activity. (a) Grand average visual-area alpha activity contralateral (darker) and ipsilateral (lighter) to the memory array in younger (blue, left panel) and older adults (green, right panel). Gray regions indicate presence and duration of the alerting cue and memory array. Note the hemispheric amplitude differences and strong phase consistency in younger compared to older adults. (b) Grand average of changes in visual-area alpha amplitude and (c) intertrial coherence relative to baseline, emphasizing the effects observable in (a).

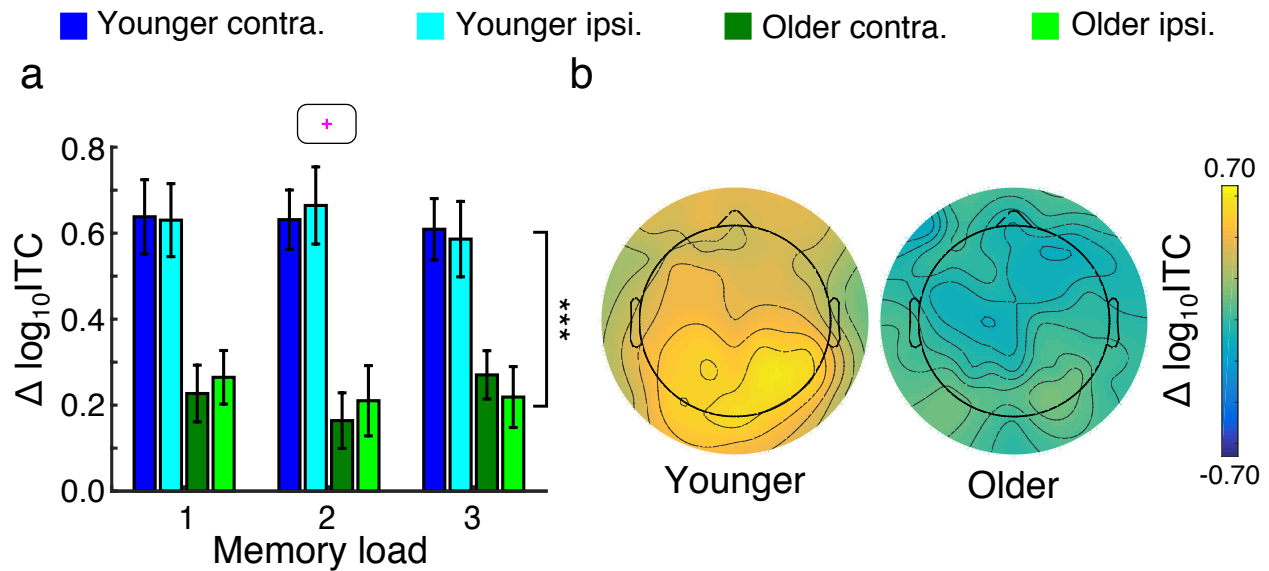

541  
542  
543  
544  
545  
546  
547  
548

**Figure 3.** Alerting cue activity. (a) Peak alpha intertrial coherence (ITC) in response to the alerting cue. Younger adults (blue) had higher cue-evoked ITC than older adults (green; \*\*\* $p < 0.001$ ; error bars, SEM). (b) Topographies of cue-evoked ITC response in younger (left) and older adults (right) during load-three trials.

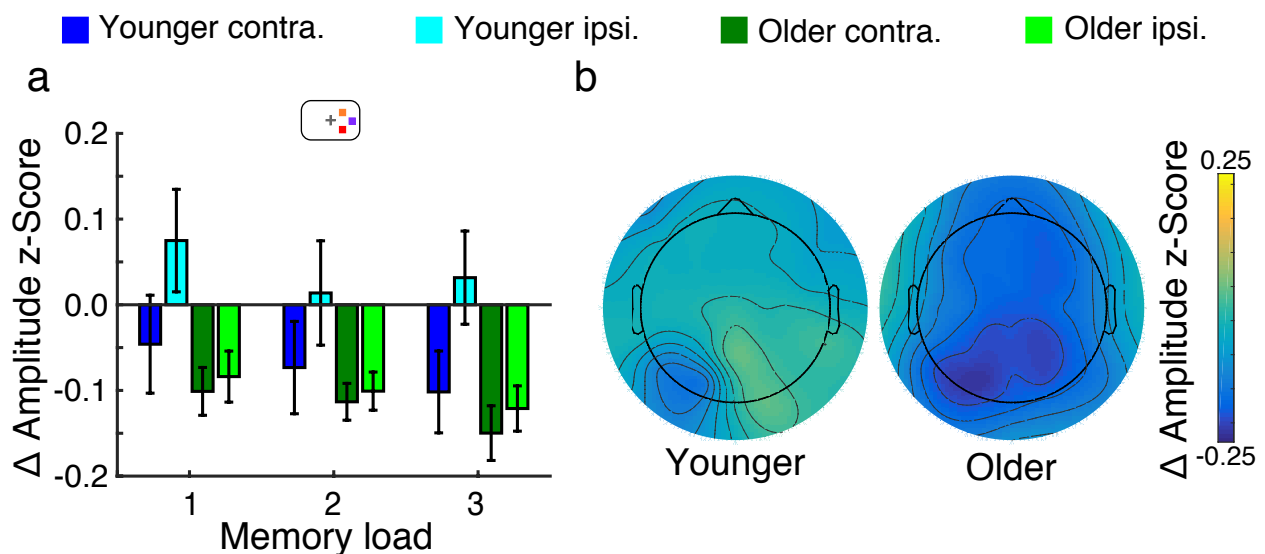

549  
550  
551  
552  
553  
554  
555

**Figure 4.** Memory array activity. (a) Average change (relative to baseline) in alpha amplitude 0 to 400 ms after memory array presentation. Amplitude decreased from load one to two ( $p < 0.05$ ), and older adults (green) showed decreased alpha lateralization ( $p < 0.01$ ; error bars, SEM). (b) Topographies of delay-period alpha amplitude in younger (left) and older adults (right) during load-three trials.

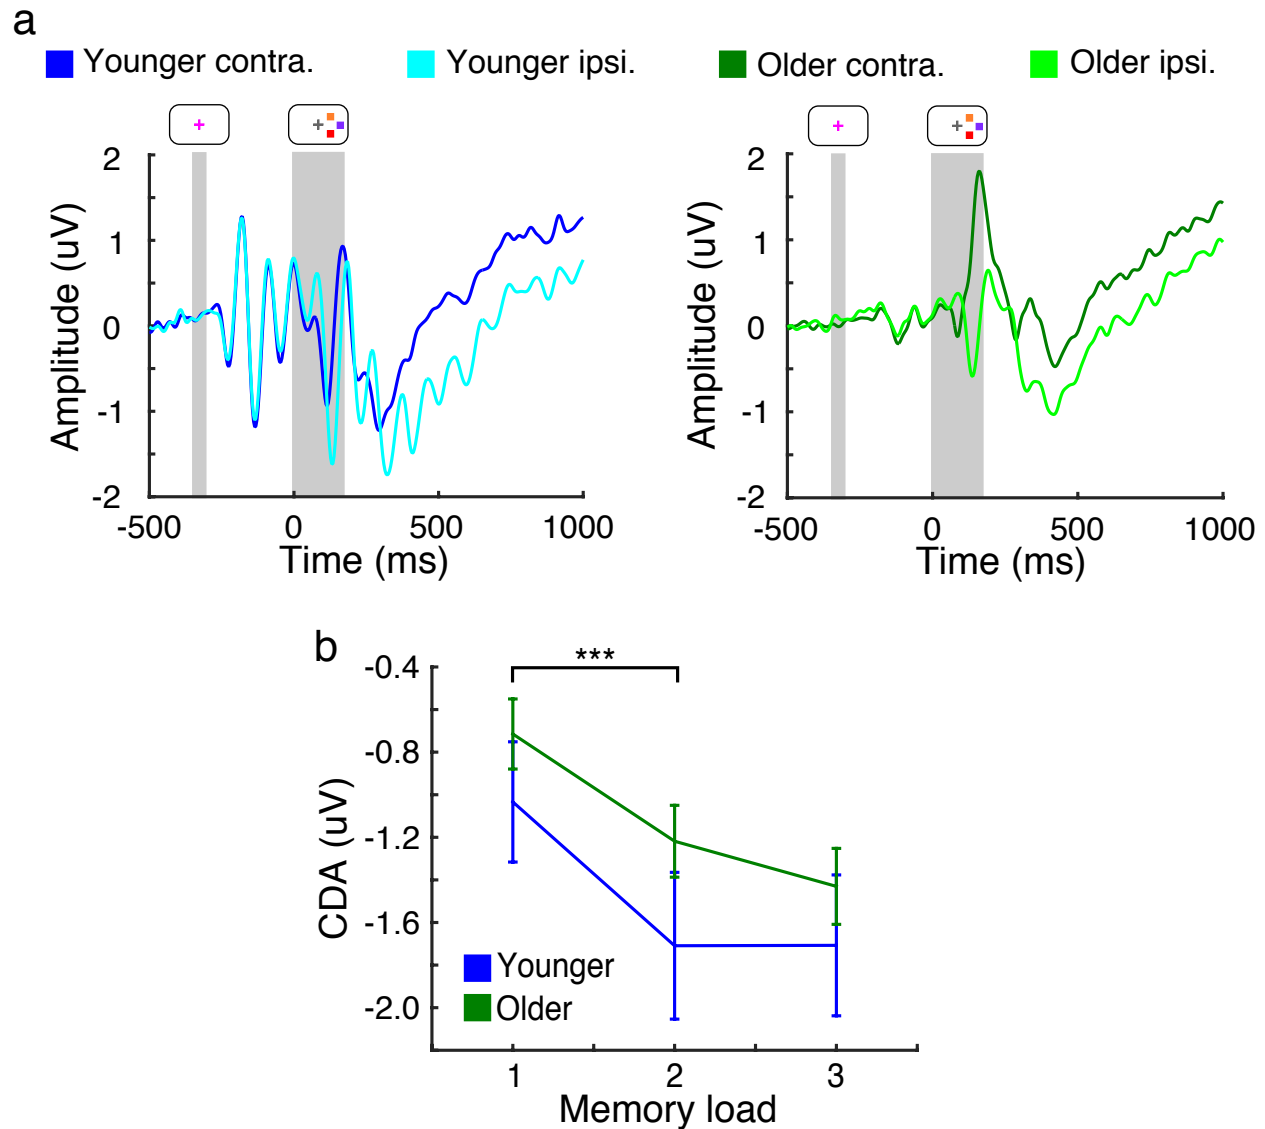

556  
557

558 **Figure 5.** Event-related potential and delay period activity. (a) Grand average visual-  
559 area activity contralateral (darker) and ipsilateral (lighter) to the memory array in  
560 younger (left panel) and older adults (right panel). Gray regions indicate presence and  
561 duration of the alerting cue and memory array. Note the sustained negativity in the  
562 contralateral hemisphere in both younger and older adults. (b) Contralateral delay  
563 activity (CDA) increased in magnitude from load-one to load-two conditions, but did not  
564 differ between younger and older adults (\*\* $p < 0.001$ ; error bars, SEM)  
565



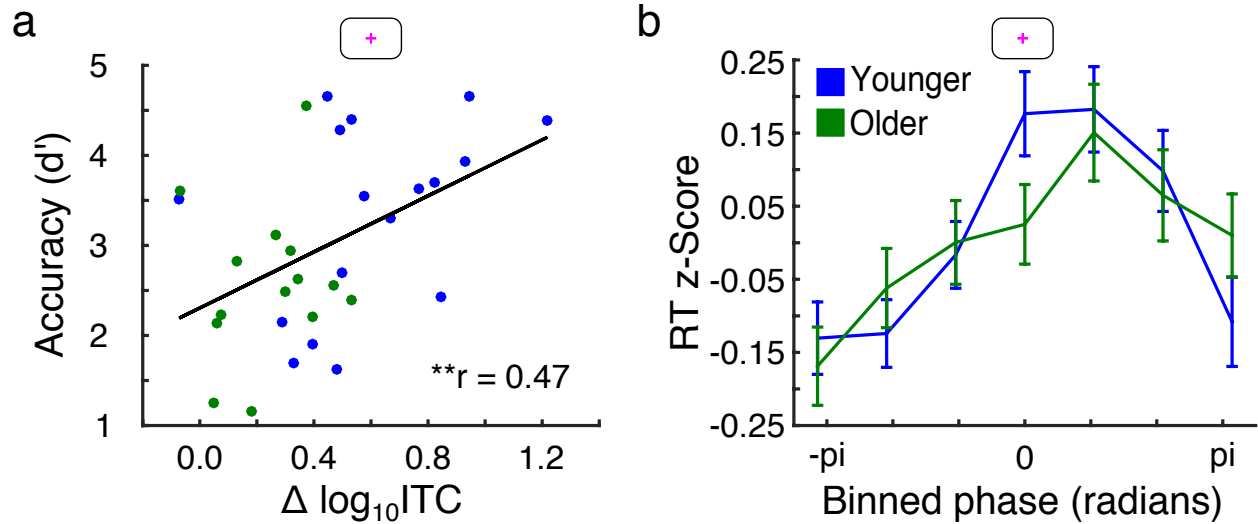

566  
567  
568  
569  
570  
571  
572  
573  
574

**Figure 6.** Alpha phase predicts working memory performance. (A) Cue-evoked alpha intertrial coherence (ITC) versus accuracy during load-three trials across younger (blue) and older adults (green). Cue-evoked ITC was predictive of load-three accuracy ( $**p < 0.01$ ). (B) Average response time (RT) binned by alpha phase at peak cue-evoked ITC. Phase of zero and  $\pm\pi$  correspond to the peaks and troughs of alpha, respectively. Trial-by-trial alpha phase predicted RTs ( $p < 10^{-3}$ ; error bars, SEM).
